# Supplementary material for: HBV Genome-Enriched Single Cell Sequencing Revealed Heterogeneity in HBV-Driven HCC
Source: Research Square preprint supplement (doi:10.21203/rs.3.rs-537064/v1), 2021-05-19
Supplement: Supplementary file 3 [file b4c273b744f6c2bead761259.docx]

Supplementary Table S7. Integration hot spots supported by known fusion events. Hot spots gene are reported as cancer fusion gene by both cancer cell line and TCGA for different kinds of cancers.

| **Hot Spot** | **Cell line fusion** | **TCGA** |
| --- | --- | --- |
| CSMD2 | G111 (Brain), YMB-1 (Breast) | LUAD, OV |
| MED30-EXT1 | EXT1: SCLC-2H (Lung); SNU-423 (Liver); HCC1395(Breast) | EXT1: BLCA;BRCA(2); OV UCEC; LGG |
